# Supplementary material
Source: PubMed Central journal article supplement (PMC1525236)

Noer et al.

**Supplementary Table S1.** *t*-test and mean  $\pm$  s.e.m. analysis of global CpG methylation percentages in the *LEP*, *PPARG2*, *FABP4* and *LPL* promoter regions examined.

| <b>Undifferentiated vs. differentiated ASCs</b>      |                |                                   |                                 |
|------------------------------------------------------|----------------|-----------------------------------|---------------------------------|
|                                                      |                | Mean $\pm$ s.e.m.                 |                                 |
|                                                      | <i>P</i> value | <i>Undifferentiated</i>           | <i>Differentiated</i>           |
| LEP                                                  | 0.165          | 14.0 $\pm$ 1.9                    | 10.1 $\pm$ 2.0                  |
| PPARG2                                               | 0.111          | 18.3 $\pm$ 2.5                    | 11.0 $\pm$ 3.3                  |
| FABP4                                                | 0.838          | 27.0 $\pm$ 8.7                    | 30.5 $\pm$ 13.9                 |
| LPL                                                  | 0.968          | 16.9 $\pm$ 5.4                    | 16.6 $\pm$ 5.6                  |
| <b>Between-donor comparison</b>                      |                |                                   |                                 |
|                                                      |                | Mean $\pm$ s.e.m.                 |                                 |
| <i>D1 vs. D2</i>                                     | <i>P</i> value | <i>Donor 1</i>                    | <i>Donor 2</i>                  |
| LEP                                                  | 0.507          | 8.5 $\pm$ 2.7                     | 6.3 $\pm$ 1.9                   |
| PPARG2                                               | 0.02           | 8.3 $\pm$ 3.7                     | 31.3 $\pm$ 7.9                  |
| FABP4                                                | 0.127          | 17.3 $\pm$ 8.7                    | 7.5 $\pm$ 4.3                   |
| LPL                                                  | 0.007          | 20.0 $\pm$ 5.1                    | 3.6 $\pm$ 2.0                   |
| <i>D2 vs. D3</i>                                     |                | <i>Donor 2</i>                    | <i>Donor 3</i>                  |
| LEP                                                  | 0.06           | 6.3 $\pm$ 1.9                     | 15.9 $\pm$ 2.7                  |
| PPARG2                                               | 0.425          | 31.3 $\pm$ 7.9                    | 23.3 $\pm$ 6.1                  |
| FABP4                                                | 0.594          | 7.5 $\pm$ 4.3                     | 12.5 $\pm$ 7.5                  |
| LPL                                                  | 0.069          | 3.6 $\pm$ 2.0                     | 12.7 $\pm$ 4.3                  |
| <i>D1 vs. D3</i>                                     |                | <i>Donor 1</i>                    | <i>Donor 3</i>                  |
| LEP                                                  | 0.006          | 8.5 $\pm$ 2.7                     | 15.9 $\pm$ 2.8                  |
| PPARG2                                               | 0.054          | 8.3 $\pm$ 3.1                     | 23.3 $\pm$ 6.1                  |
| FABP4                                                | 0.594          | 17.3 $\pm$ 8.7                    | 12.5 $\pm$ 7.5                  |
| LPL                                                  | 0.285          | 20.0 $\pm$ 5.0                    | 12.7 $\pm$ 4.3                  |
| <b>Uncultured vs. cultured undifferentiated ASCs</b> |                |                                   |                                 |
|                                                      |                | Mean $\pm$ s.e.m.                 |                                 |
|                                                      | <i>P</i> value | <i>Uncultured</i><br>(all donors) | <i>Cultured</i><br>(all clones) |
| LEP                                                  | 0.166          | 10.3 $\pm$ 2.1                    | 14.4 $\pm$ 1.9                  |
| PPARG2                                               | 0.497          | 21.2 $\pm$ 5.6                    | 17.0 $\pm$ 1.9                  |
| FABP4                                                | 0.291          | 15.0 $\pm$ 6.4                    | 31.7 $\pm$ 12.9                 |
| LPL                                                  | 0.462          | 13.3 $\pm$ 3.8                    | 18.6 $\pm$ 5.9                  |

**Supplementary Figure S1.** CpG dinucleotide-containing regions examined in this study in the human (A) *LEP*, (B) *PPARG2*, (C) *FABP4*, (D) *LPL*, (E) *MYOG*, (F) *CD31* and (G) *GAPDH* loci. ATG, translational start site. TSS, transcriptional start site. Numbers refer to nucleotide number in relation to the ATG start (+1). Arrows shown for *MYOG*, *CD31* and *GAPDH* indicate the first (5') and last (3') CpG examined by direct sequencing of PCR products (see Supplementary Figure S3).

**Supplementary Figure S2.** DNA methylation analysis of *LEP*, *PPARG2*, *FABP4* and *LPL* promoters in each ASC clone, before differentiation and after three weeks of adipogenic differentiation. Percentage of methylation at each CpG for indicated loci is shown. Note that data shown for *LEP*, clone A2, only rely on 2 bacterial clone sequences (Figure 4A) due to cloning difficulties.

**Supplementary Figure S3.** Sequences of PCR products from bisulfite-converted DNA (direct sequencing). (A) *MYOG*, (B) *CD31* and (C) *GAPDH*. White and black arrows indicate, respectively, the 5'- and 3'-most CpG sequenced. Matching arrows in each sequence are shown in Supplementary Figures S1A-S1E. Note the reversed position of the 3' and 5' ends in Supplementary Figure S3 compared to Figures S1E-S1G, due to reverse sequencing.

Noer et al.  
Supplementary Figure S1

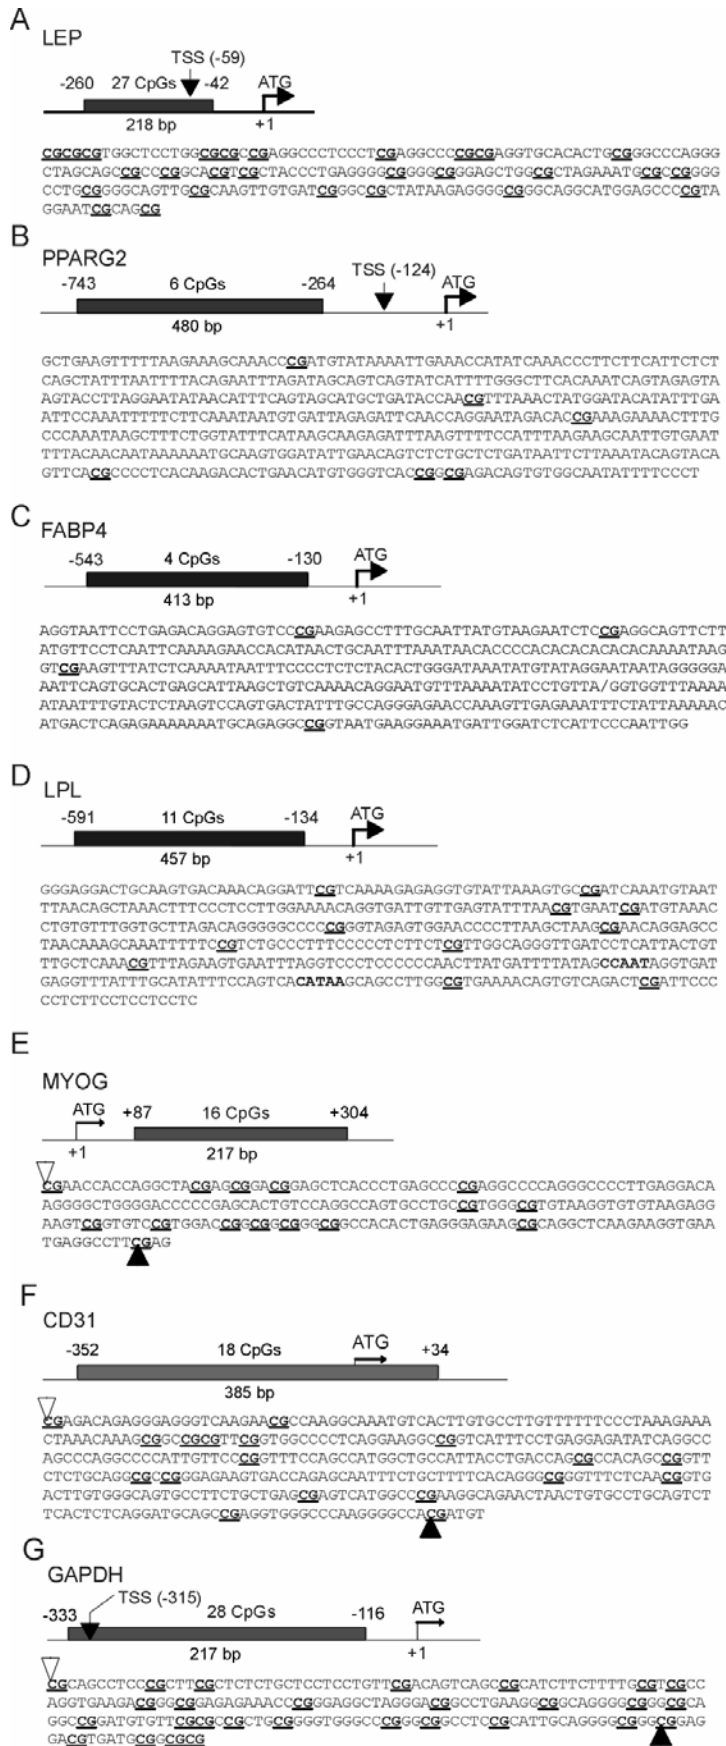

Noer et al.  
Supplementary Figure S2

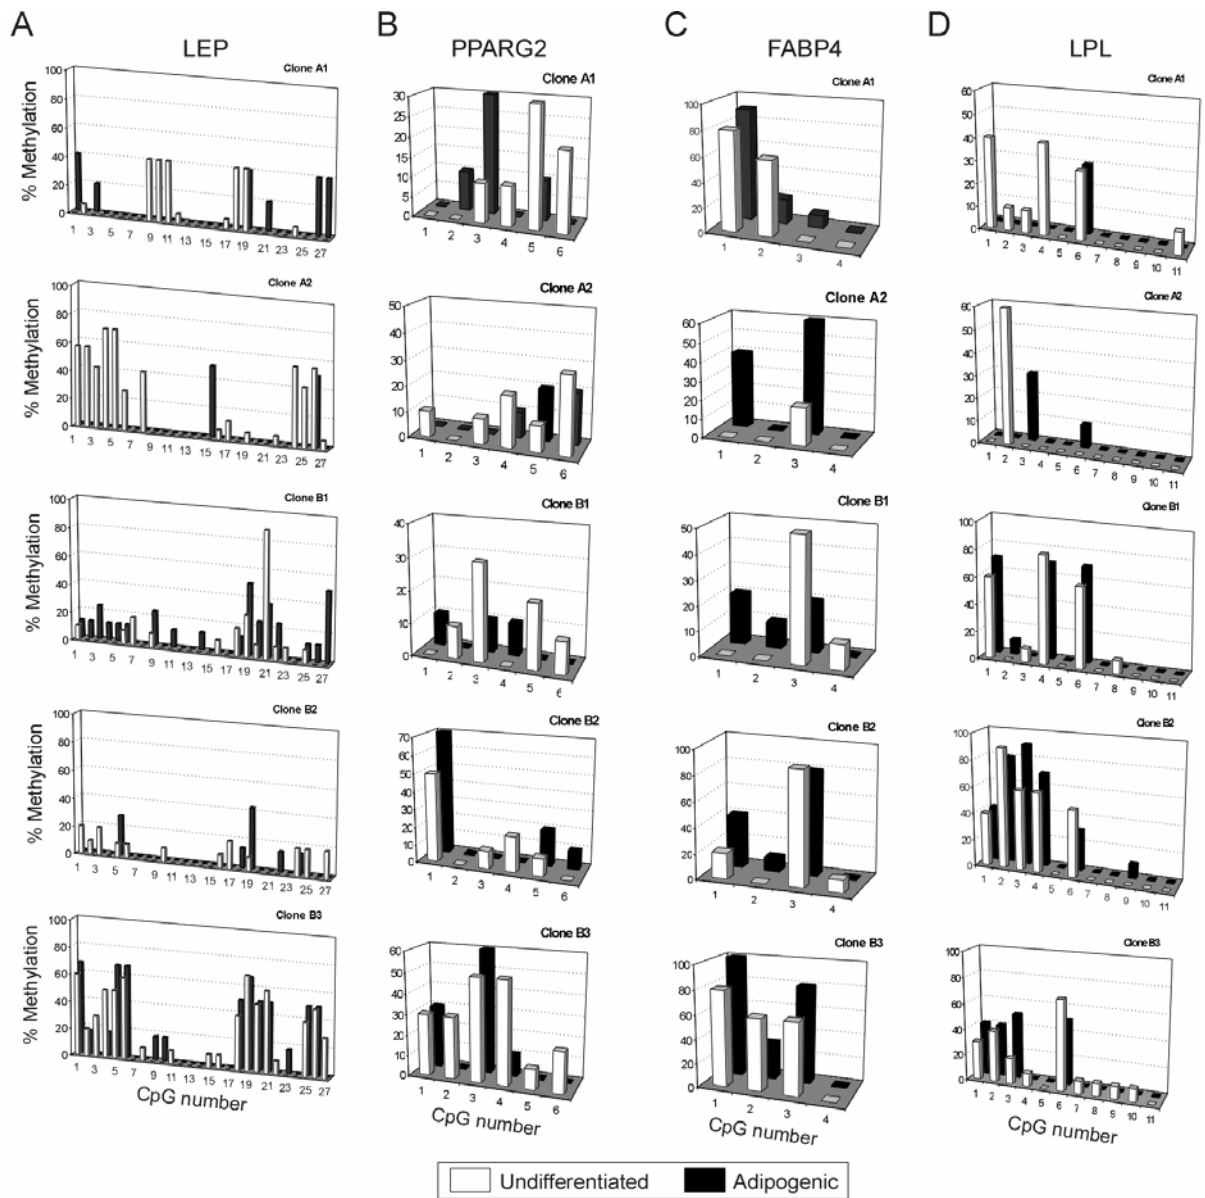

Supplement: mbc_E06-04-0322_1.pdf [file mbc_E06-04-0322_1.pdf]
